# Supplementary material
Source: PubMed Central journal article supplement (PMC3323931)
Supplement: tlo0502_0098SD1.pdf [file tlo0502_0098SD1.pdf]

**Table W1.** Proteins Analyzed and Antibodies Used in This Study.

|  | Antibody                   | Distributor | Dilution                         |        |
|--|----------------------------|-------------|----------------------------------|--------|
|  | p <sup>S118</sup> ERα      | No. 2511    | Cell Signaling, Danvers, MA      | 1:2000 |
|  | FAK                        | No. 3285    | Cell Signaling, Danvers, MA      | 1:2000 |
|  | GSK3-β                     | No. 9315    | Cell Signaling, Danvers, MA      | 1:1000 |
|  | p <sup>S9</sup> GSK3-β     | No. 9336    | Cell Signaling, Danvers, MA      | 1:1000 |
|  | HSP27                      | No. 2402    | Cell Signaling, Danvers, MA      | 1:1000 |
|  | ILK                        | No. 3856    | Cell Signaling, Danvers, MA      | 1:2000 |
|  | MET                        | No. 3127    | Cell Signaling, Danvers, MA      | 1:1000 |
|  | PAI-1                      | AHP1100     | Serotec, Oxford, United Kingdom  | 1:5000 |
|  | PI3K                       | No. 4292    | Cell Signaling, Danvers, MA      | 1:1000 |
|  | p38                        | No. 9212    | Cell Signaling, Danvers, MA      | 1:1000 |
|  | p <sup>T180/Y182</sup> p38 | No. 4631    | Cell Signaling, Danvers, MA      | 1:1000 |
|  | ROCK                       | No. 4035    | Cell Signaling, Danvers, MA      | 1:1000 |
|  | p <sup>S727</sup> STAT3    | No. 9136    | Cell Signaling, Danvers, MA      | 1:1000 |
|  | uPA                        | Ab19893     | Abcam, Cambridge, United Kingdom | 1:500  |

**Table W2.** Patient and Disease Characteristics Related to the Collective of 52 Node-Positive Patients Analyzed to Study Protein Expression Correlations between Primary Tumor and Lymph Node Metastases.

| Factor                  | Patient Collective (n = 52) |      |
|-------------------------|-----------------------------|------|
|                         | No. Patients                | %    |
| Age                     |                             |      |
| <50                     | 6                           | 11.5 |
| ≥50                     | 46                          | 88.5 |
| Tumor state             |                             |      |
| T1                      | 11                          | 21.2 |
| T2                      | 31                          | 59.6 |
| T3                      | 7                           | 13.5 |
| T4                      | 3                           | 5.8  |
| Nodal status            |                             |      |
| N1                      | 22                          | 42.3 |
| N2                      | 16                          | 30.8 |
| N3                      | 14                          | 26.9 |
| Subtype                 |                             |      |
| Ductal                  | 38                          | 73.1 |
| Lobular                 | 10                          | 19.2 |
| Ductal-lobular          | 2                           | 3.8  |
| Other                   | 2                           | 3.8  |
| Distant metastasis      |                             |      |
| Positive                | 0                           | 0.0  |
| Negative                | 50                          | 96.2 |
| Unknown                 | 2                           | 3.8  |
| Grading                 |                             |      |
| 1                       | 1                           | 1.9  |
| 2                       | 24                          | 46.1 |
| 3                       | 27                          | 51.9 |
| Hormone receptor status |                             |      |
| Positive                | 41                          | 78.9 |
| Negative                | 10                          | 19.2 |
| Unknown                 | 1                           | 1.9  |

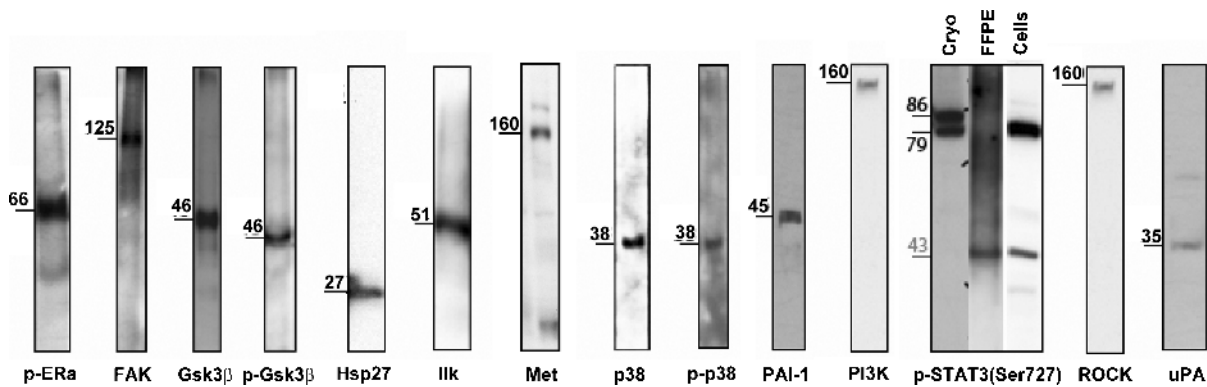

**Figure W1.** Validation of antibody specificity by Western blot analysis. All antibodies were validated using breast cancer FFPE tissue samples unless stated otherwise.

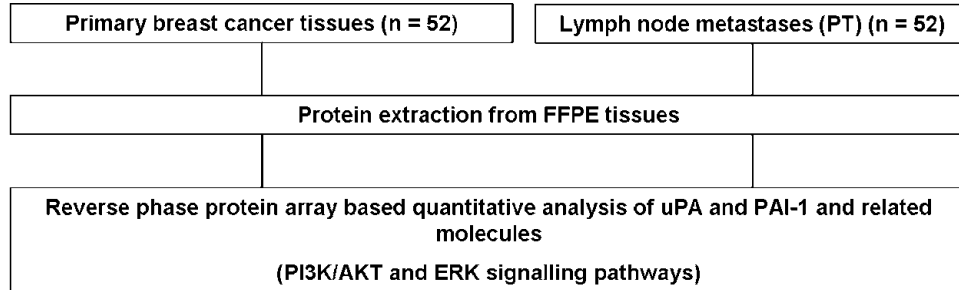

**Figure W2.** Strategy for the analysis of the collective used in this study.

**Table W3.** Correlation of the Expression of the 14 Analyzed Signaling Molecules between Primary Tumors and Lymph Node Metastases.

|                | $r_s$        | $P$ (two-sided) |
|----------------|--------------|-----------------|
| FAK            | <b>0.597</b> | <b>.000</b>     |
| GSK3- $\beta$  | 0.270        | >.999           |
| pGSK3- $\beta$ | <b>0.646</b> | <b>.000</b>     |
| ILK            | <b>0.697</b> | <b>.000</b>     |
| MET            | <b>0.603</b> | <b>.001</b>     |
| PI3K           | <b>0.655</b> | <b>.000</b>     |
| ROCK           | <b>0.571</b> | <b>.000</b>     |
| pp38           | <b>0.576</b> | <b>.000</b>     |
| p38            | <b>0.651</b> | <b>.000</b>     |
| PAI-1          | 0.173        | >.999           |
| uPA            | <b>0.566</b> | <b>.008</b>     |
| pSTAT3         | <b>0.453</b> | <b>.000</b>     |
| pER            | <b>0.446</b> | <b>.000</b>     |

The Spearman correlation coefficient  $r_s$  and  $P$  values are shown. All  $P$  values are adjusted for multiple testing as described in the Materials and Methods section. Statistically significant correlations are in bold face emphases.

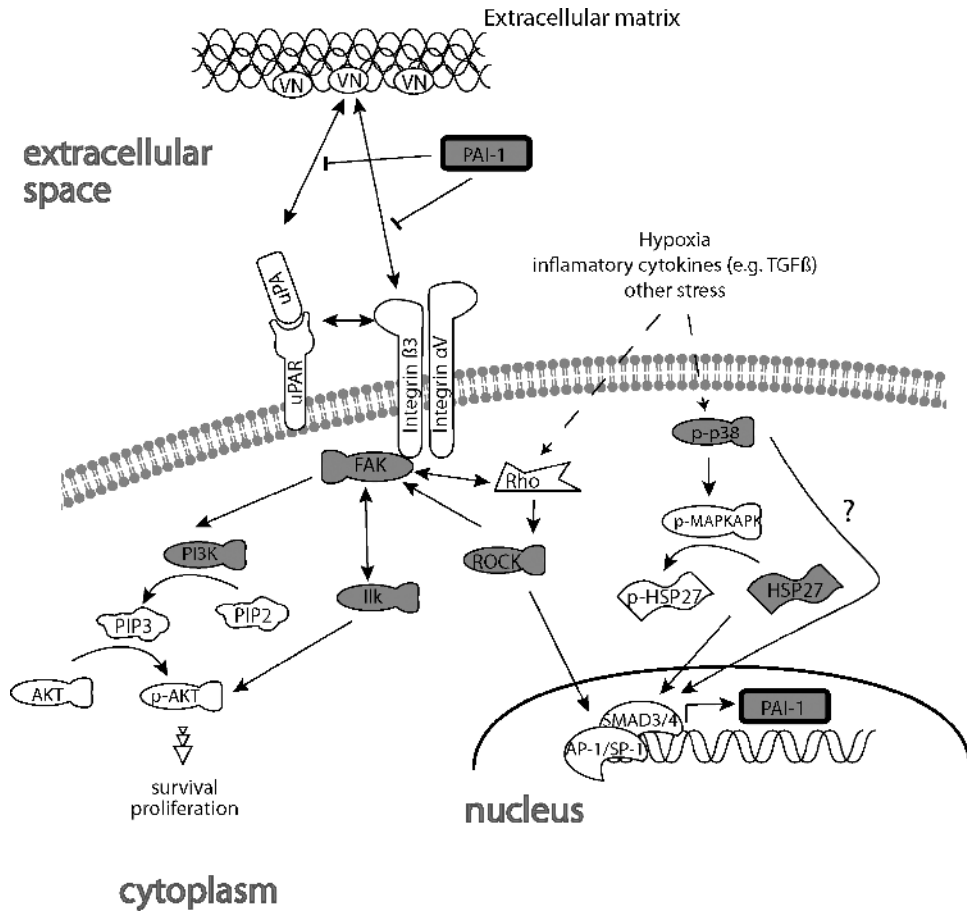

**Figure W3.** Overview of pathways correlating with high PAI-1 expression (gray). PAI-1 expression was found to be correlated with several proteins involved in AKT signaling (FAK, ILK, ROCK, and PI3K), supporting the assumption that PAI-1 is involved in the activation of AKT through integrin  $\alpha_V\beta_3$ -induced PI3K activation. Furthermore, PAI-1 correlates with HSP27 and pp38, which are known to increase PAI-1 expression through transcription factor activation.
